# Supplementary material for: Sulphation and ammonia regeneration of a Pt/MnOx–CeO2/Al2O3 catalyst for NOx-assisted soot oxidation
Source: Royal Society of Chemistry journal article supplement (doi:10.1039/c8cy00027a), 2018-01-01
Supplement: c8cy00027a1.pdf [file c8cy00027a1.pdf]

## Supplementary Information

Sulphation and ammonia regeneration of Pt/MnO<sub>x</sub>-CeO<sub>2</sub>/Al<sub>2</sub>O<sub>3</sub>  
catalyst for NO<sub>x</sub>-assisted soot oxidation

Yuxi Gao<sup>a</sup>, Xiaodong Wu<sup>a,\*</sup>, Robin Nord<sup>b</sup>, Hanna Härelind<sup>b</sup> and Duan Weng<sup>a,\*</sup>

<sup>a</sup> *Key Laboratory of Advanced Materials of Ministry of Education of China, School of Materials Science and Engineering, Tsinghua University, Beijing 100084, China*

<sup>b</sup> *Competence Centre for Catalysis, Department of Chemistry and Chemical Engineering, Chalmers University of Technology, SE-412 96 Gothenburg, Sweden*

---

\*Corresponding authors

E-mail address: [wuxiaodong@tsinghua.edu.cn](mailto:wuxiaodong@tsinghua.edu.cn) (X. Wu), [duanweng@tsinghua.edu.cn](mailto:duanweng@tsinghua.edu.cn) (D. Weng)

**(1) Calculation process of the sulphate amounts on the sulphated and regenerated samples.**

The difference of mass loss between the sulphated/regenerated sample and the fresh one within the temperature range at 400 - 1100 °C in the TGA analyses in Fig. 7 was attributed mainly to the decomposition of sulphates. The decomposition followed the reaction of:

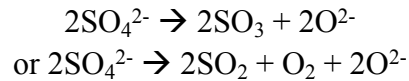

Hence, the amount of sulphates deposited on the samples was estimated roughly by the following equation.

$$m(\text{SO}_4^{2-}) = \frac{M(\text{SO}_4^{2-})}{M(\text{SO}_3)} \times m(\text{SO}_3)$$

where  $m(\text{SO}_3)$ : mass loss difference between the sulphated/regenerated sample and the fresh one at 400 – 1100 °C by the TG data in Table 3,  $M(\text{SO}_4^{2-})$ : relative mass of  $\text{SO}_4^{2-}$  = 96.06, and  $M(\text{SO}_3)$ : relative mass of  $\text{SO}_3$  = 80.06.

## (2) Calculation process of the overall Pt surface area per gram sample.

With the assumption that Pt particles were hemisphere shape on the support, the number of platinum particles on 1 g samples was calculated as:

$$n(Pt) = \frac{m(Pt)}{\rho(Pt)} / \left( \frac{2}{3} \pi R^3 \right)$$

where  $m(Pt)$ : mass of platinum in 1 g sample = 0.01 g,  $\rho(Pt)$ : density of platinum =  $21.45 \text{ g}\cdot\text{cm}^{-3}$ ,  $R$ : average radius of platinum particles estimated from the TEM images.

The average surface area of each particles followed the equation of:

$$S_0 = 2\pi R^2$$

Hence, the overall Pt surface area per gram sample was:

$$\begin{aligned} S &= S_0 \times n(Pt) \\ &= \frac{3m}{\rho R} \\ &= \frac{1.4 \times 10^3 \text{ m}^3 \cdot \text{g}^{-1}}{R} \end{aligned}$$
